# Supplementary material for: Pressure-induced photoluminescence enhancement of CeF3:Tb3+ nanoparticles
Source: Royal Society of Chemistry journal article supplement (doi:10.1039/d2na00166g), 2022-01-01
Supplement: d2na00166g1.pdf [file d2na00166g1.pdf]

## Supporting information

### Pressure-induced Photoluminescence Enhancement of $\text{CeF}_3:\text{Tb}^{3+}$ nanoparticles

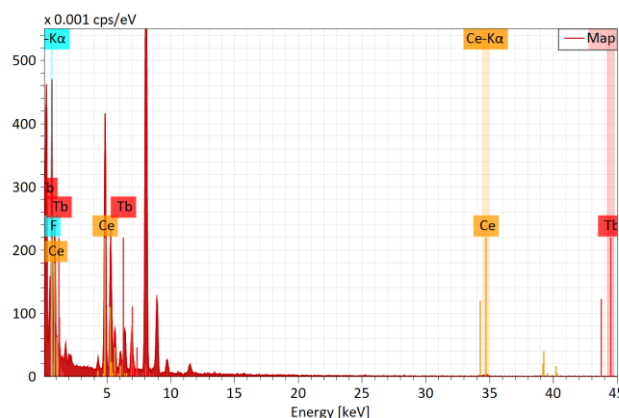

**Figure S1.** Energy dispersive X-ray (EDX) pattern of  $\text{CeF}_3:\text{Tb}^{3+}$  nanoparticles at 1atm.

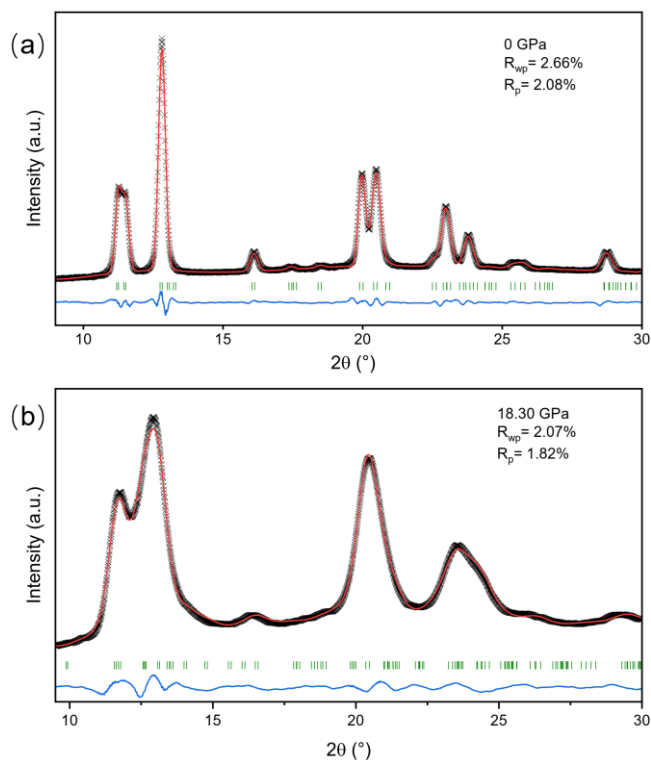

**Figure S2.** Rietveld analysis result of  $\text{CeF}_3:\text{Tb}^{3+}$  nanoparticles before and after structure change, respectively.
